# Supplementary material for: Glycoursodeoxycholic acid ameliorates diet-induced metabolic disorders with inhibiting endoplasmic reticulum stress
Source: PubMed Central journal article supplement (PMC8302808; doi:10.1042/cs20210198), 2021-07-20
Supplement: CS-2021-0198_supp.pdf [file CS-2021-0198_supp.pdf]

## Supplementary Figure 1

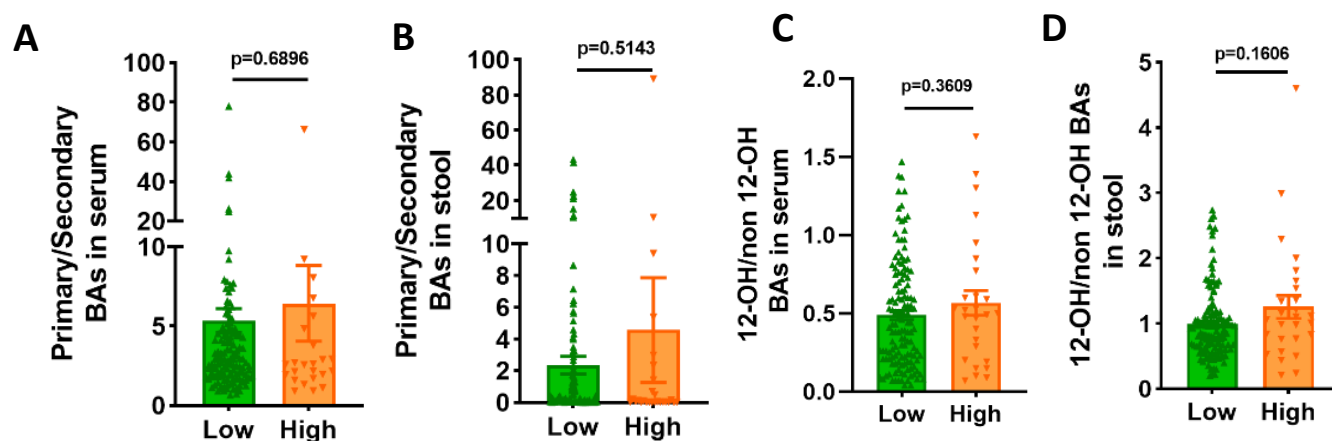

**Supplementary Figure 1. Levels and composition of bile acids in samples.** **A**, Ratios of primary to secondary bile acids in the serum and **B**, stool. **C**, The ratios of 12 $\alpha$ -OH to non 12 $\alpha$ -OH bile acids in serum and **D**, stool. n =135 for Low group, n=28 for High group. Data are shown as the mean  $\pm$  SEM and analyzed by Wilcoxon signed-rank test.

## Supplementary Figure 2

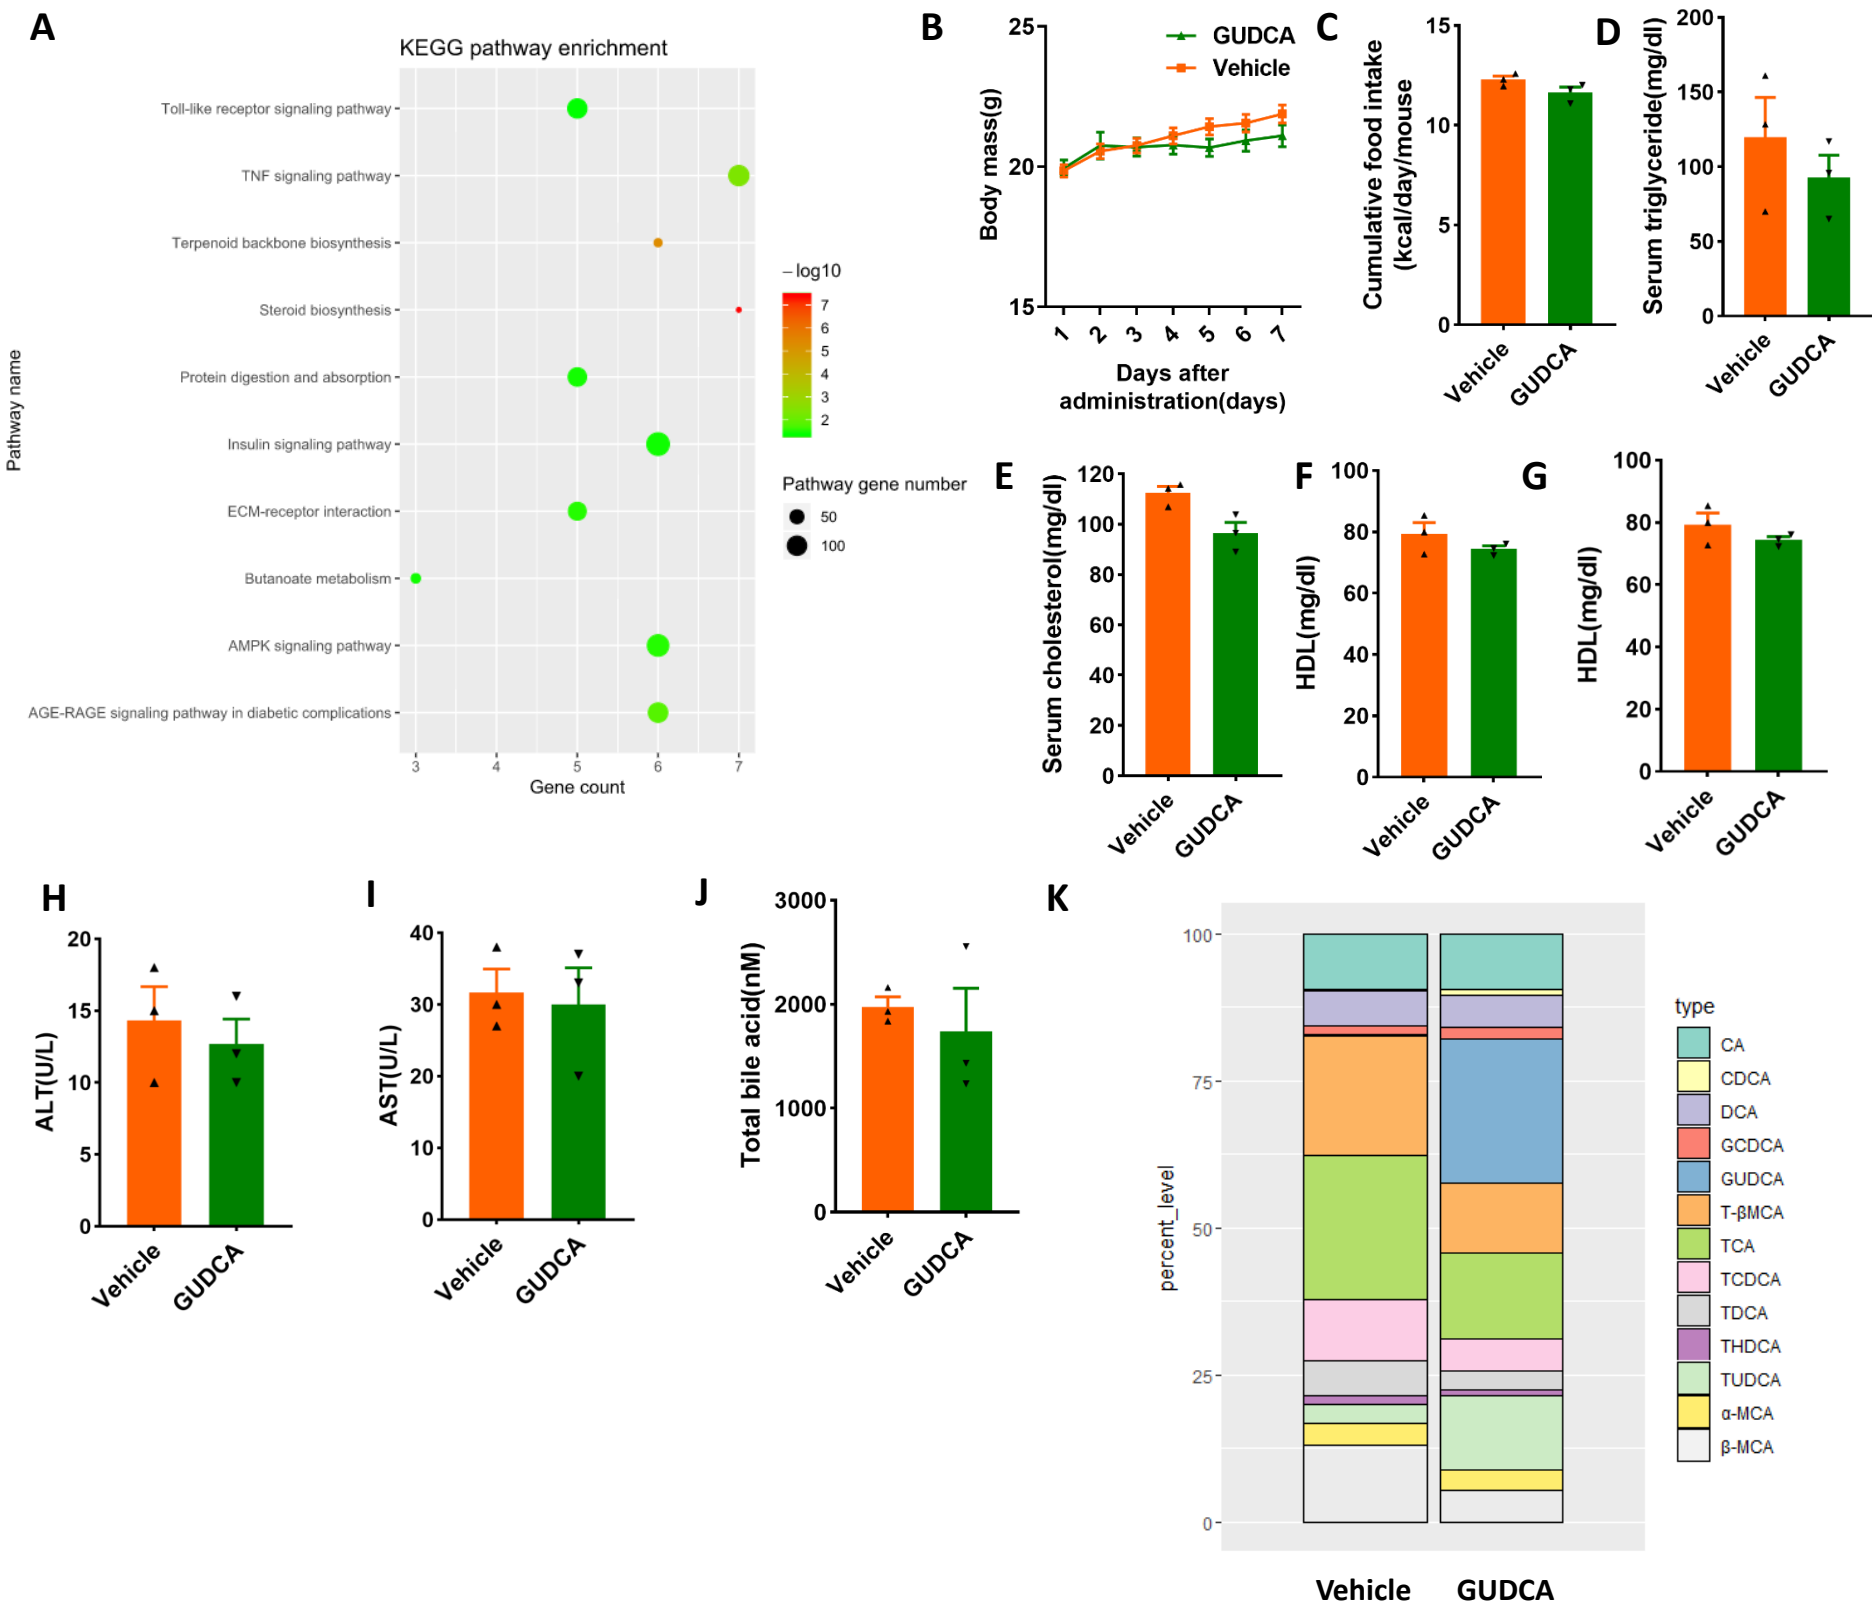

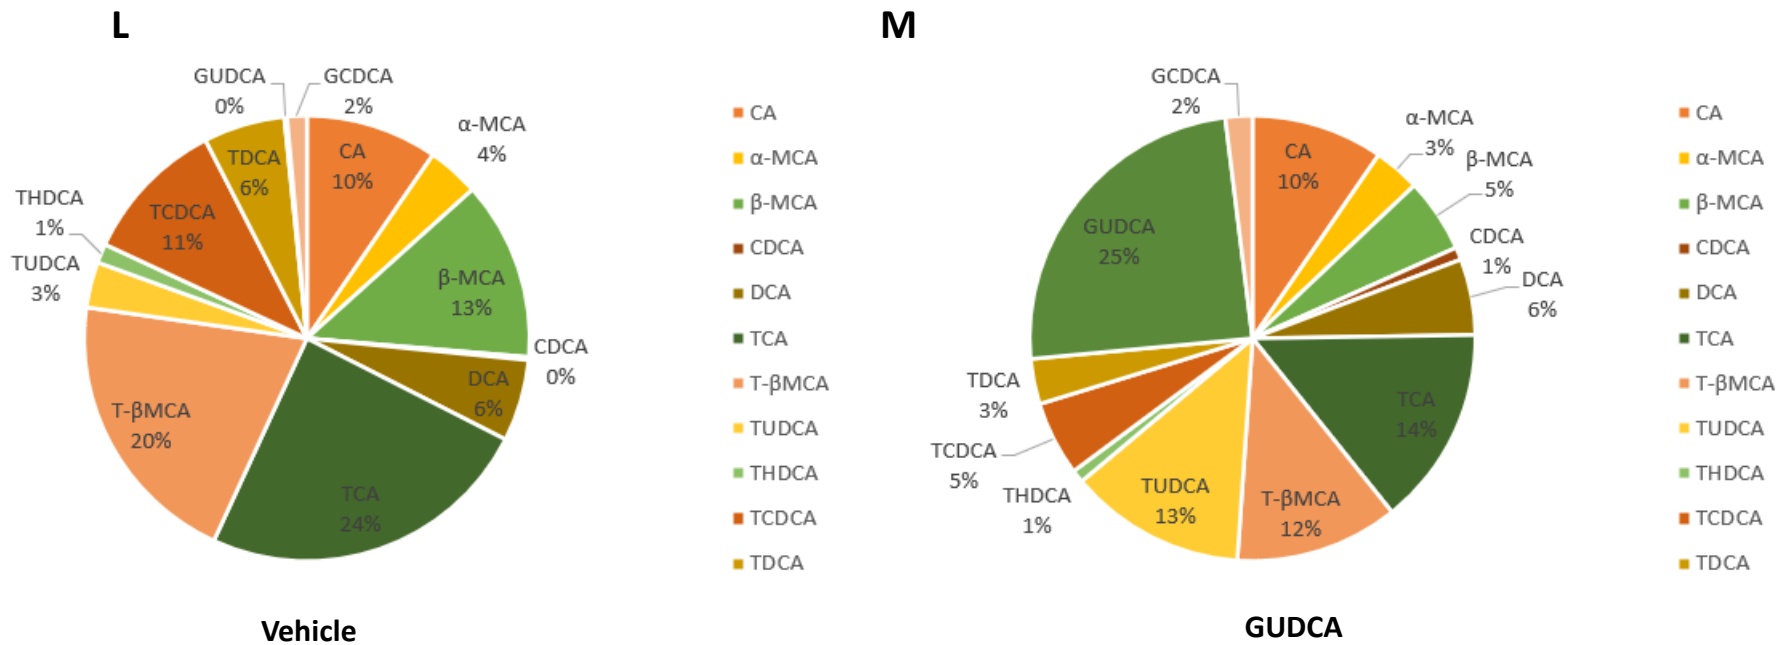

**Supplementary Figure2. RNA-seq and biochemical indicators of mice. A,** KEGG pathways. **B,** Body weight. **C,** Cumulative food intake. **D,** Serum triglyceride content. **E,** Serum cholesterol content. **F,** Serum LDL levels. **G,** Serum HDL levels. **H,** Serum ALT and **I,** AST levels. **J,** Total bile acids in serum. **K-M,** Composition of bile acids in serum. (n = 3/group). Data are shown as the mean ± SEM and analyzed by Two-tailed unpaired Student's t test.

### Supplementary Figure 3

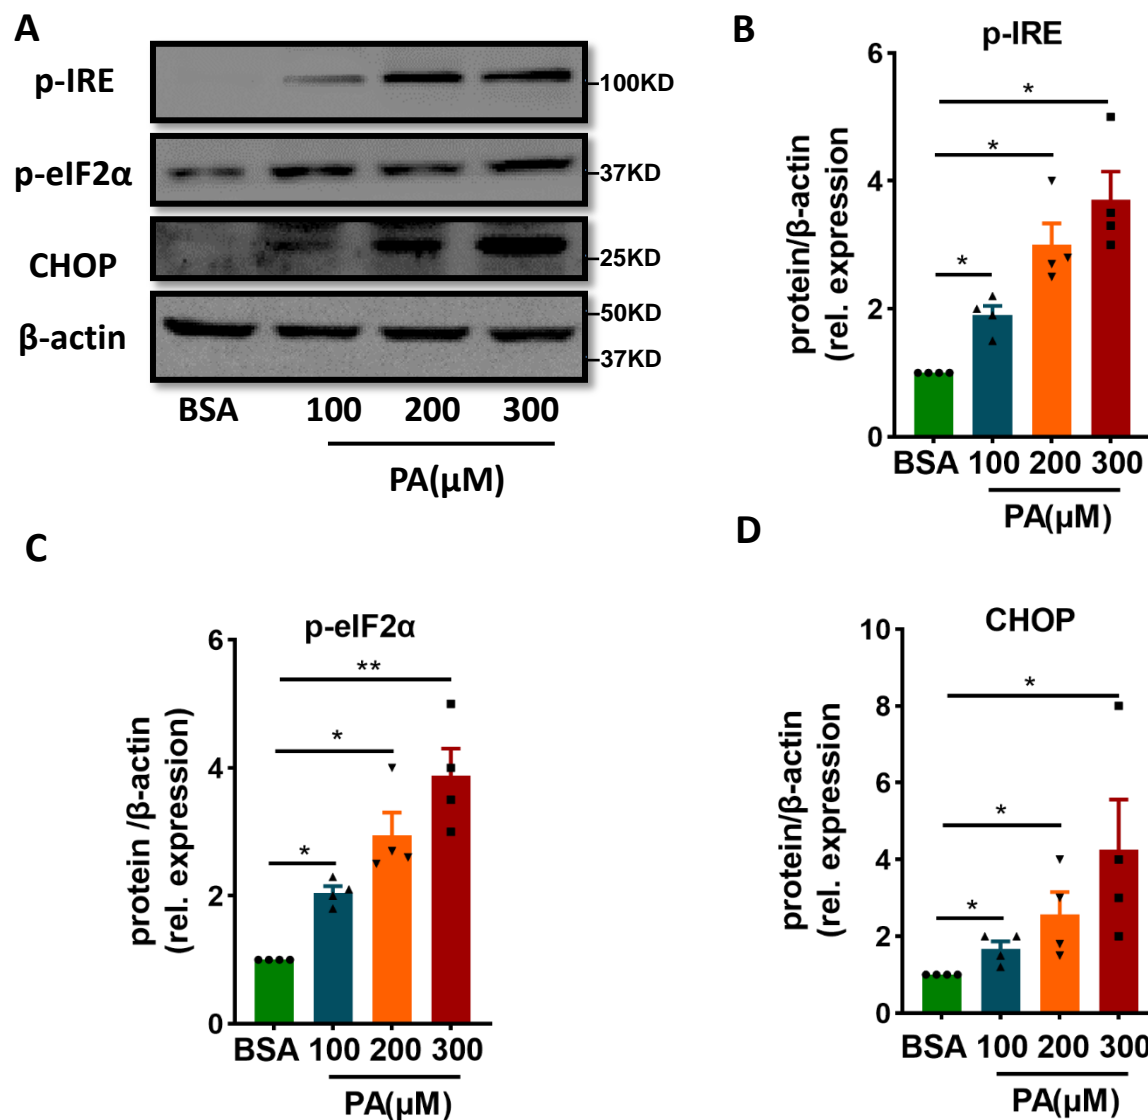

**Supplementary Figure 3. Palmitate induces ER stress expression in dose dependent manners.** **A**, p-IRE, p-eIF2 $\alpha$  and CHOP expression were measured by western blot. **B-D**, The statistical graph (n=4/group). All data are presented as the mean  $\pm$  SEM and analyzed by one-way ANOVA followed by the Bonferroni post hoc test. \*P < 0.05, \*\*P < 0.01 vs. control.

# Supplementary Figure 4

**A**

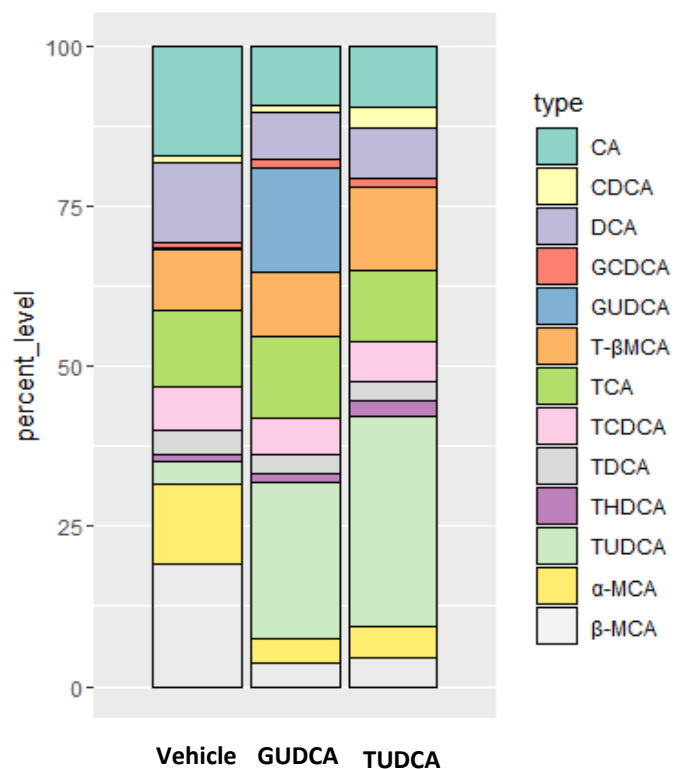

**B**

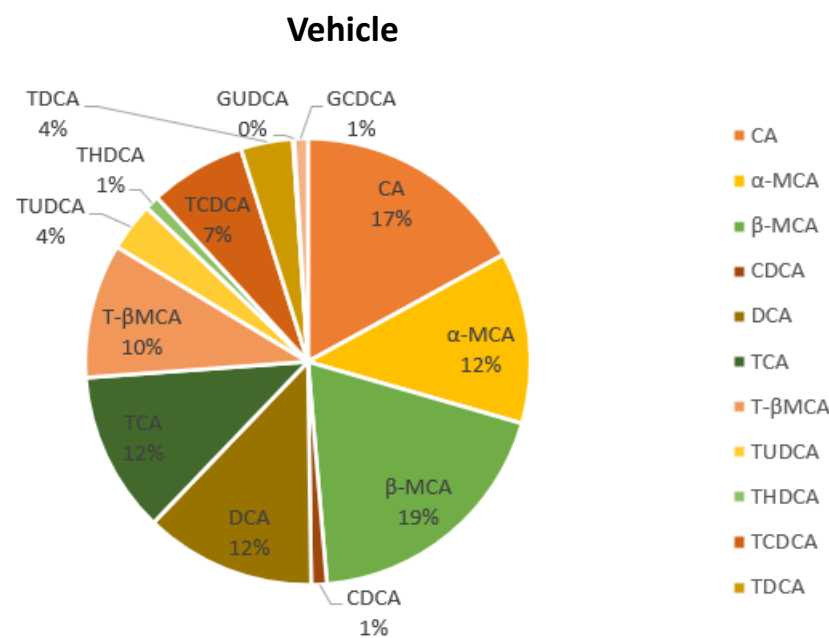

**C**

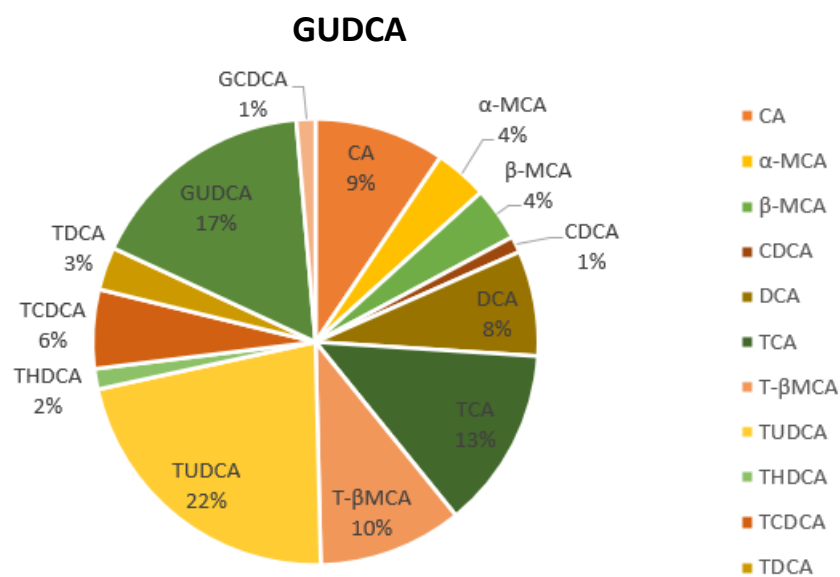

**D**

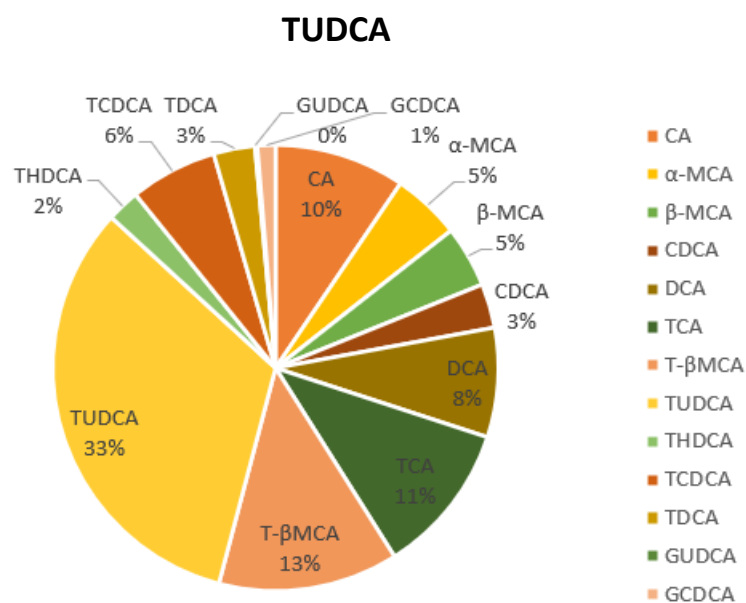

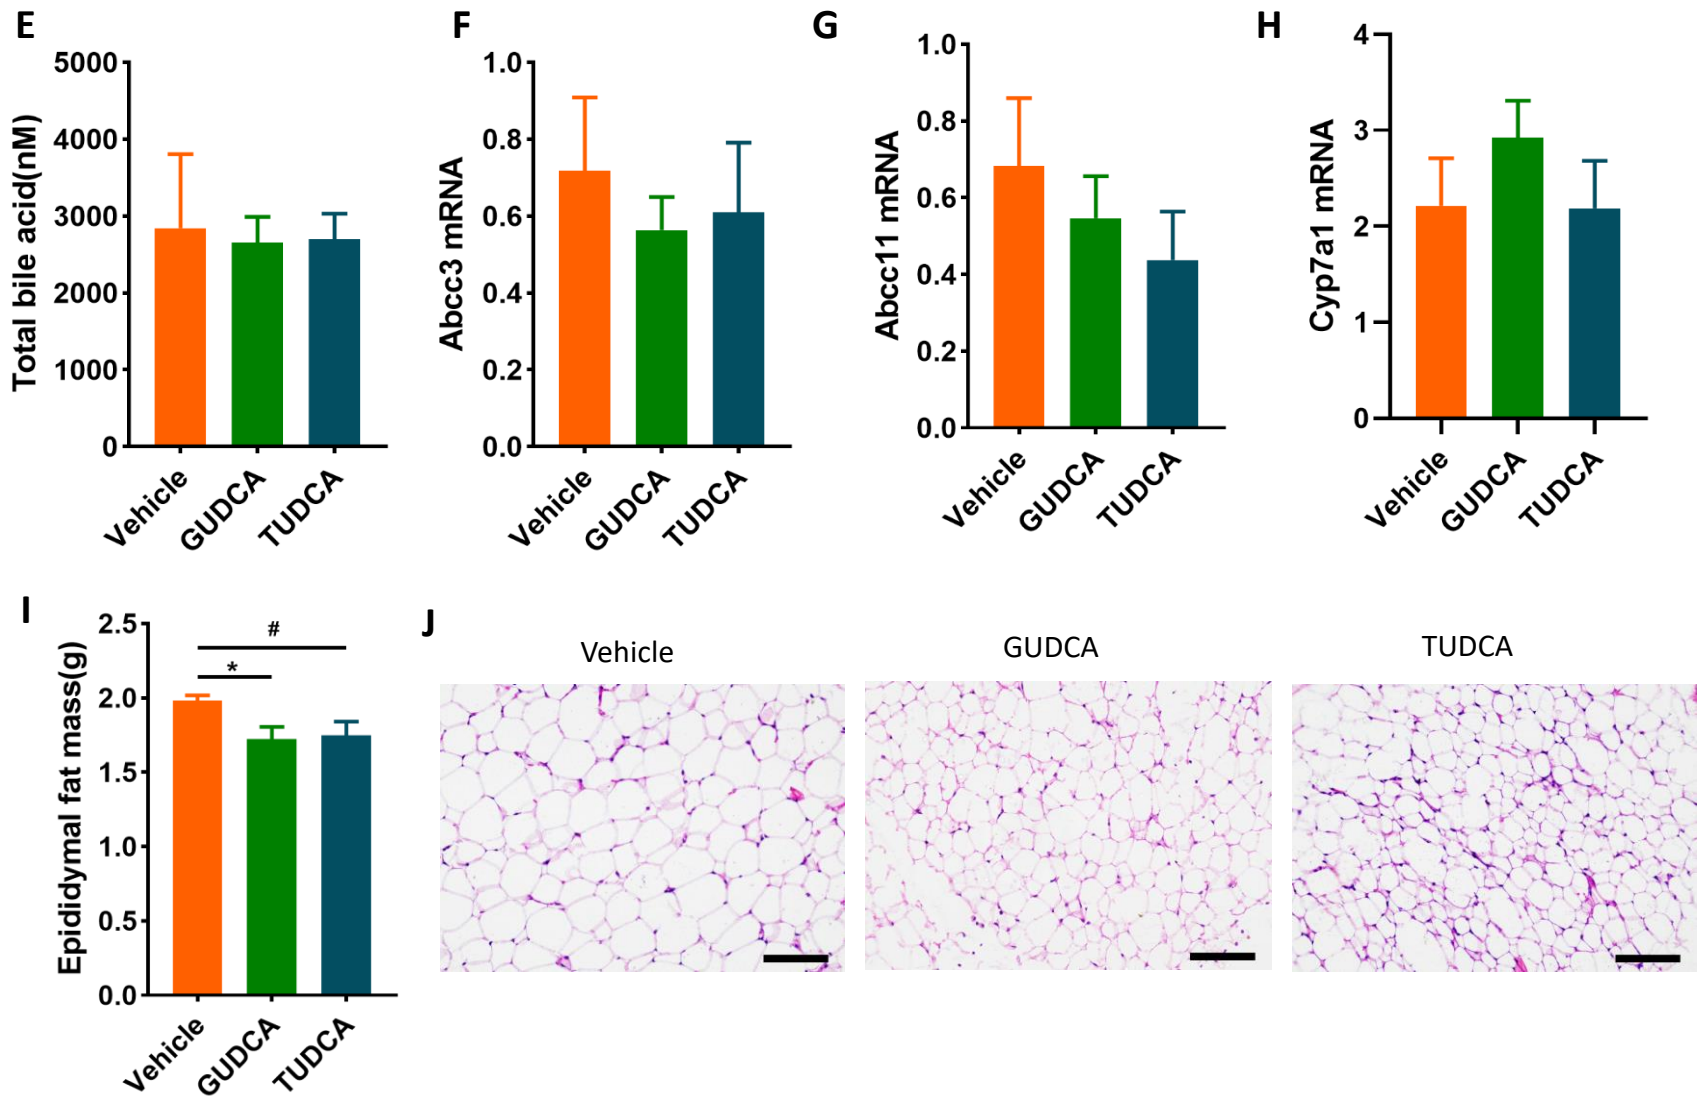

**Supplementary Figure 4.** **A-D**, Composition of bile acids in serum of vehicle, GUDCA or TUDCA treated mice. **E**, Total bile acid in serum. **F**, The mRNA expression of Abcc3 **G**, Abcc11 and **H**, Cyp7a1. **I**, Epididymal fat mass. **J**, H&E staining of inguinal adipose tissue (n = 5-8/group). Data are presented as the mean  $\pm$  SEM and analyzed by one-way ANOVA followed by the Bonferroni post hoc test.

Supplementary Figure 5

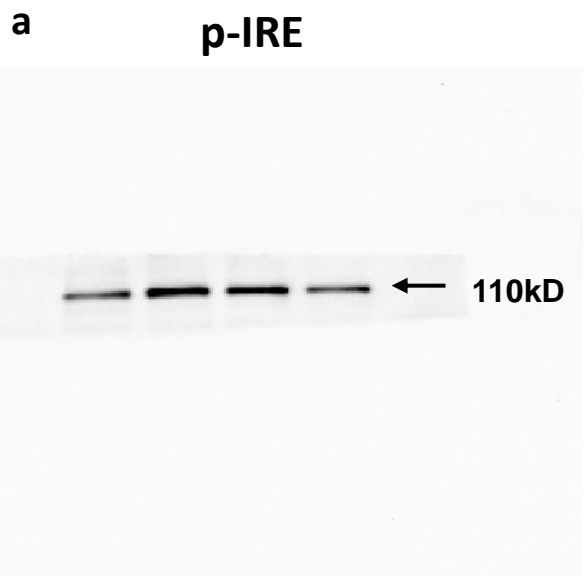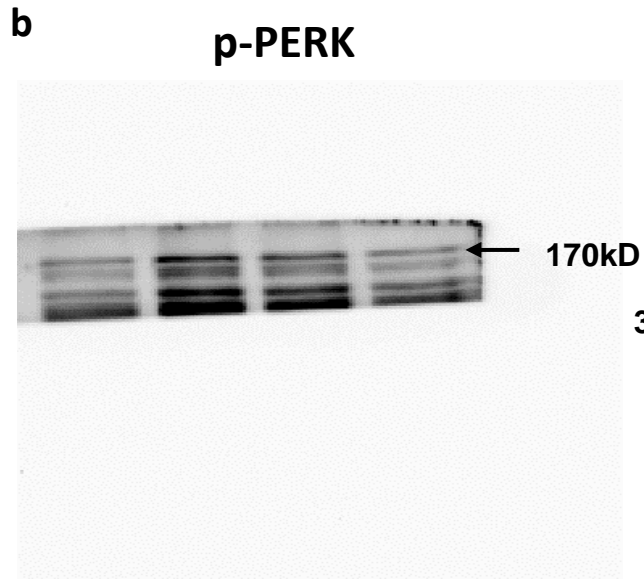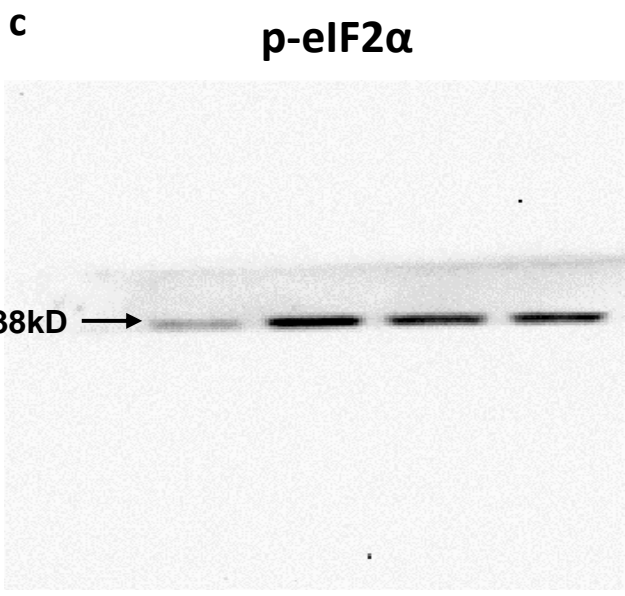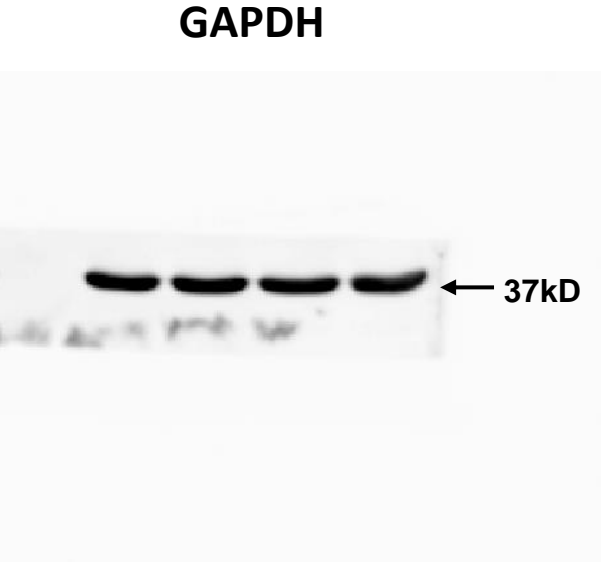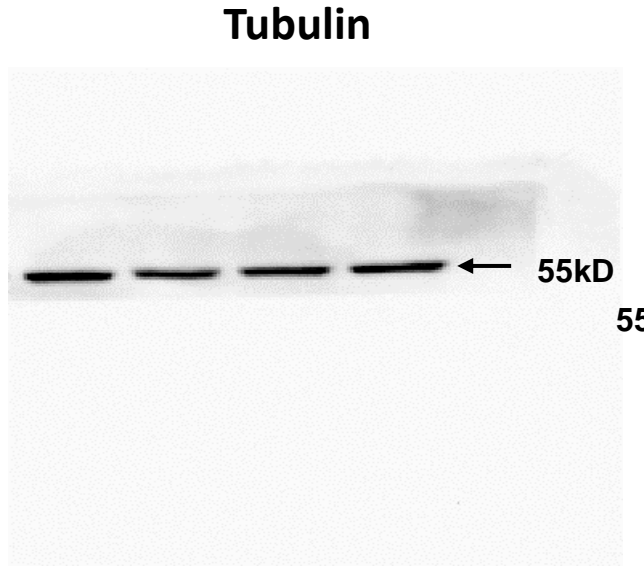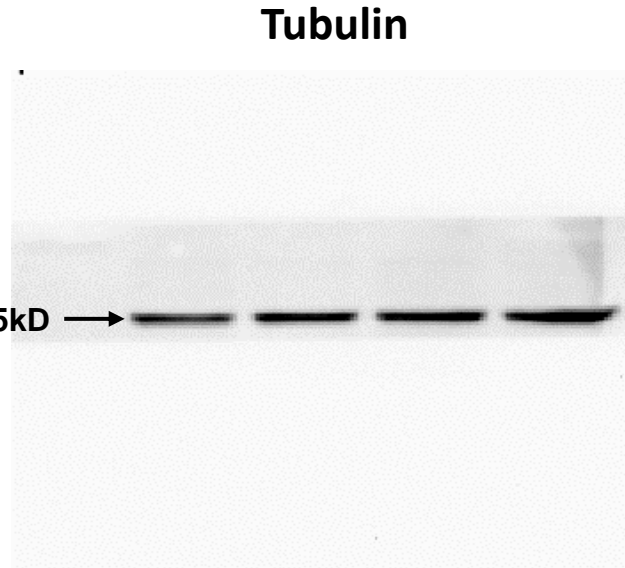

**d** CHOP

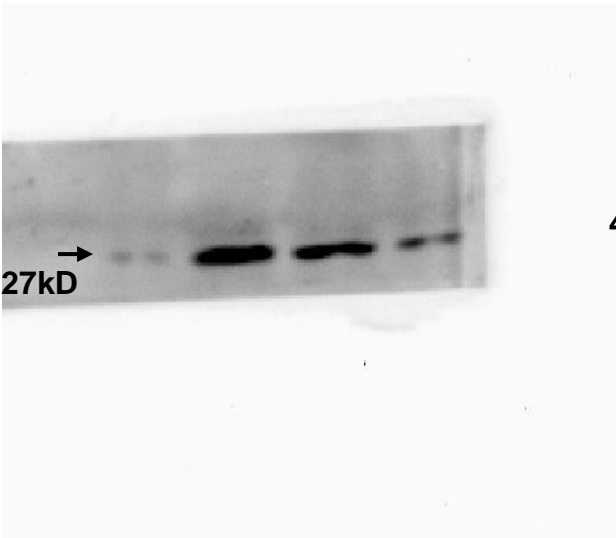

**e** p-p38

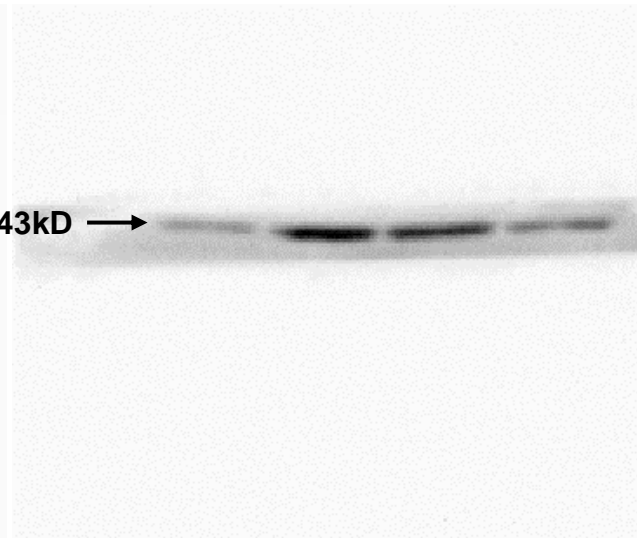

**f** p-JNK

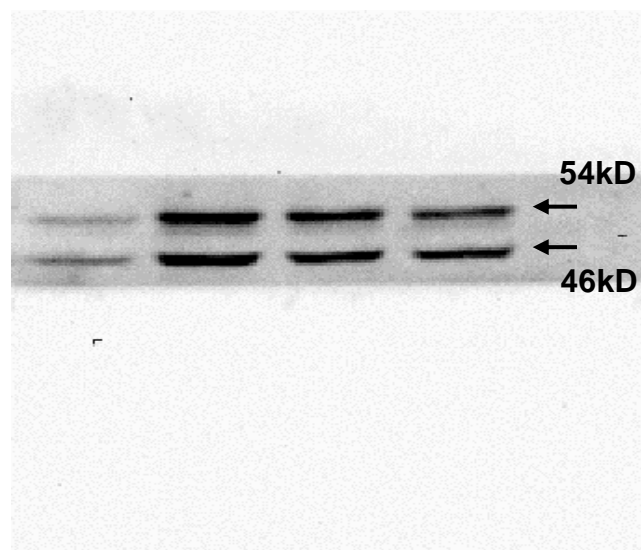

**$\beta$ -actin**

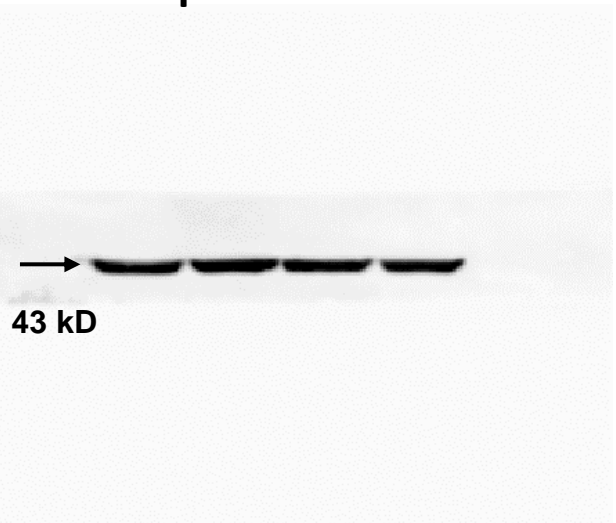

**GAPDH**

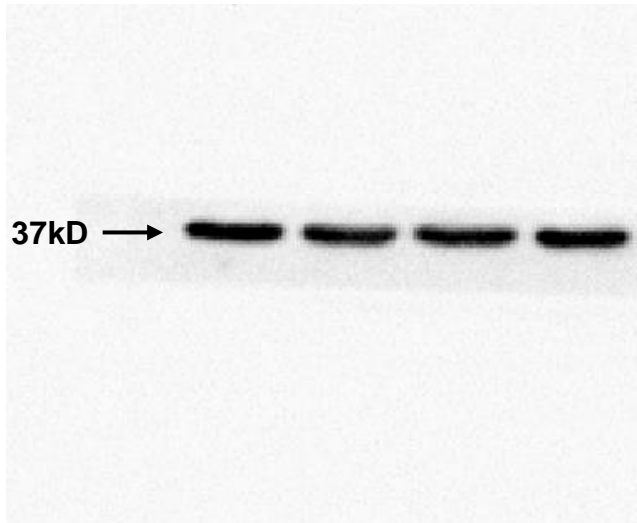

**GAPDH**

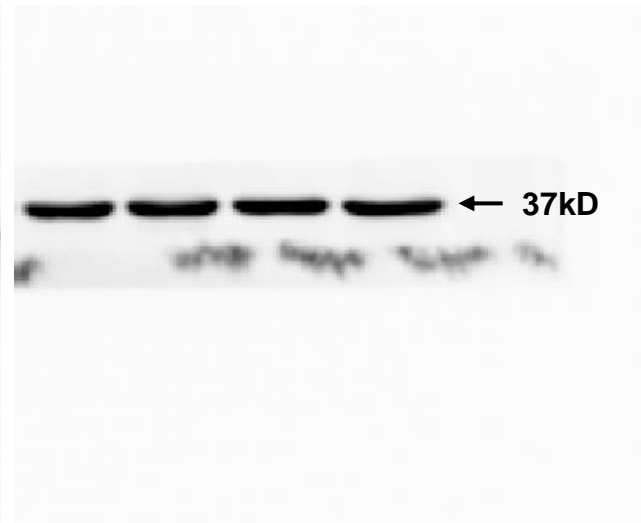



g

**Bax**

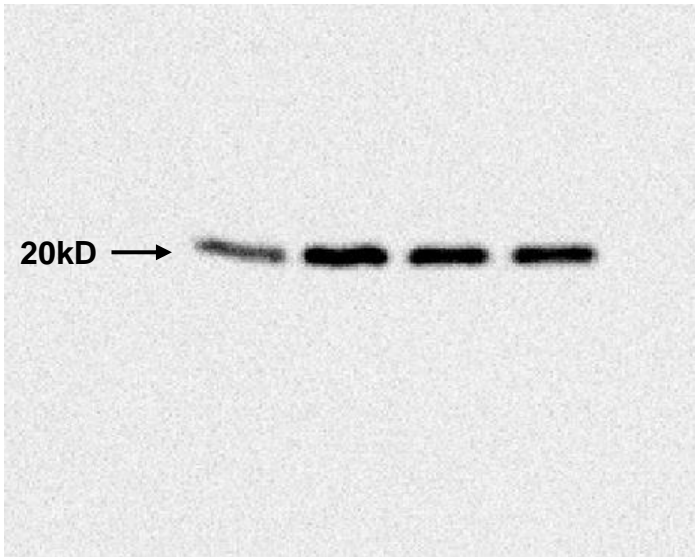

**C-caspase3**

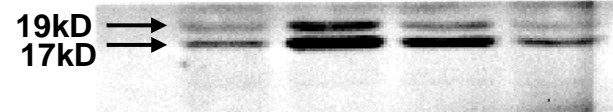

**Bcl2**

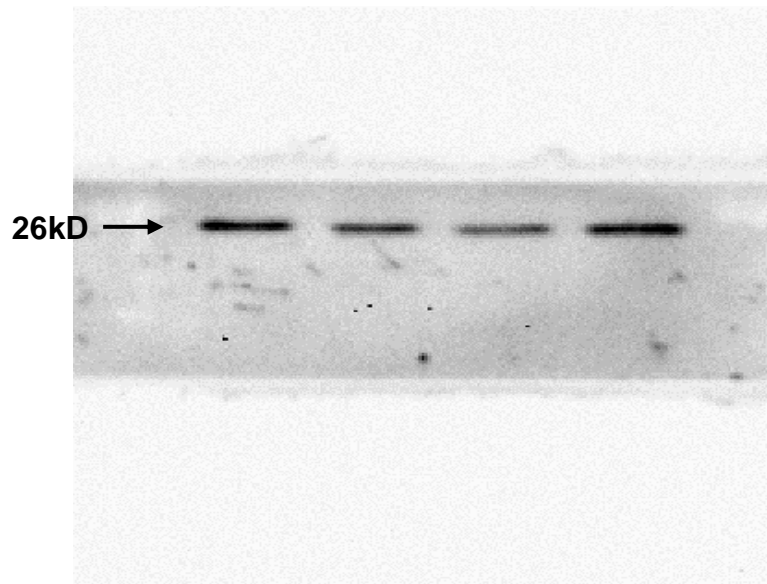

**$\beta$ -actin**

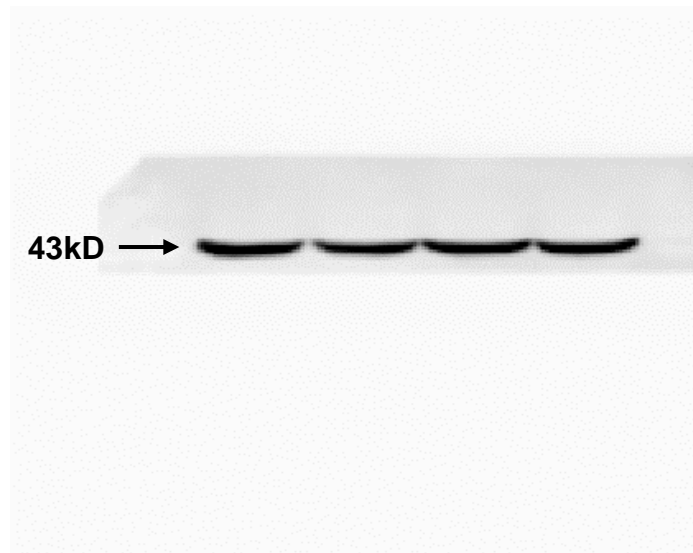

**h**

**SERCA2**

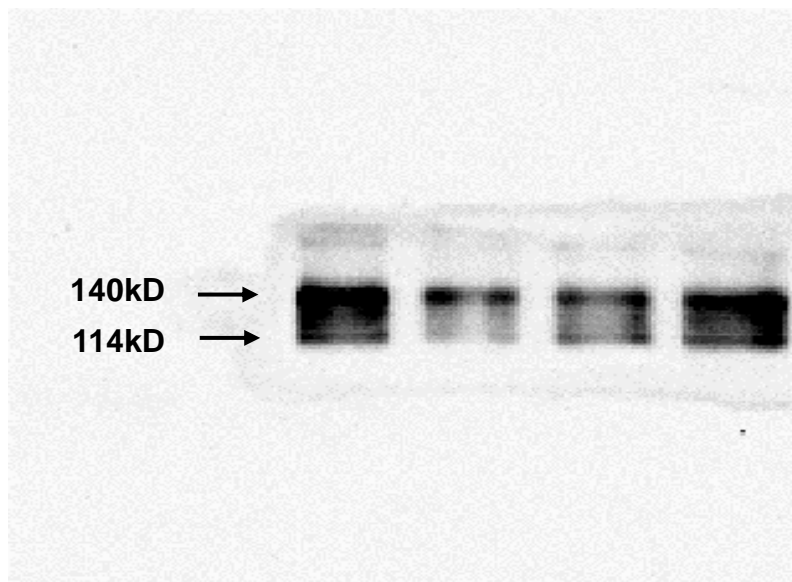

**$\beta$ -actin**

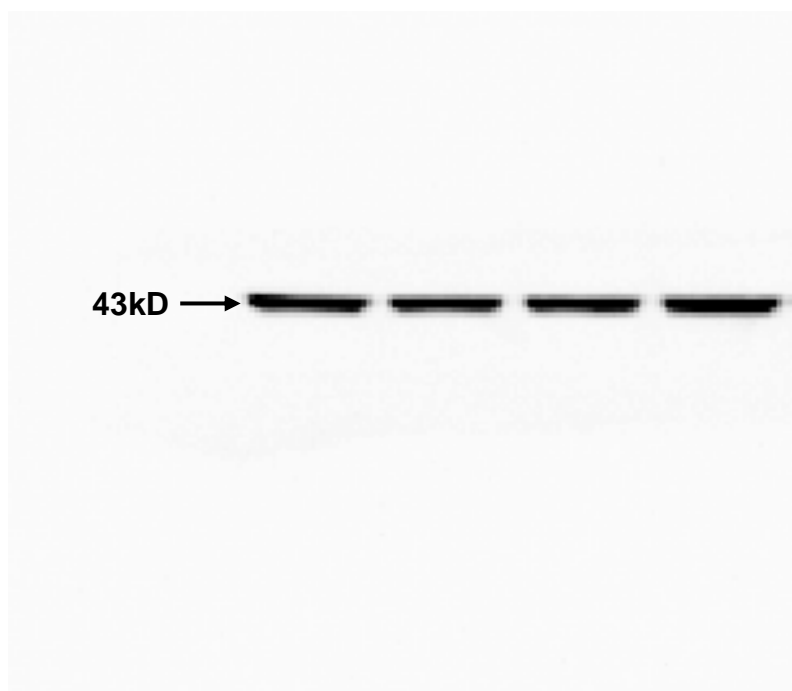

**i**

**Irs1**

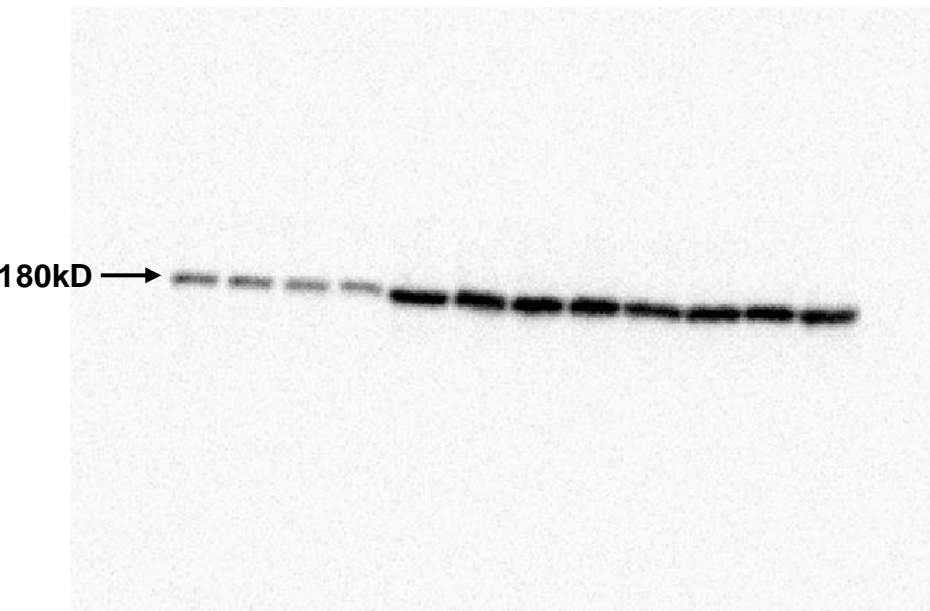

**p-AKT**

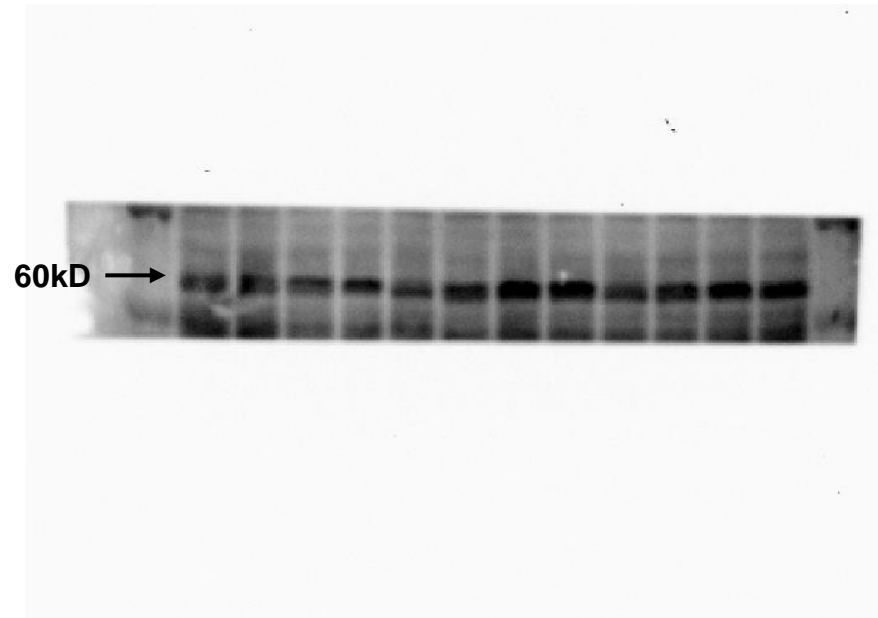

**AKT**

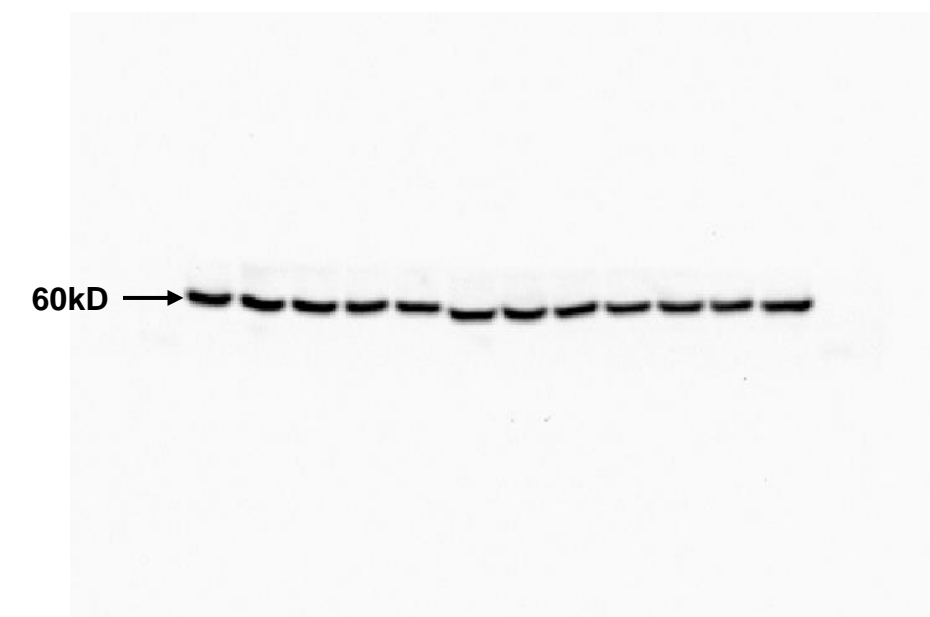

**GAPDH**

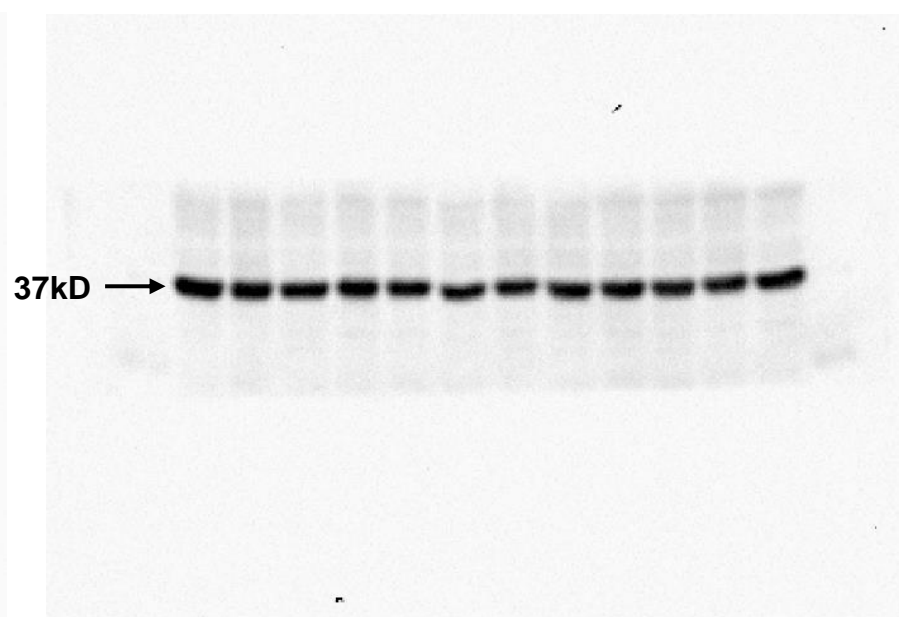

**p-IRE**

**p-eIF2 $\alpha$**

**j**

**110kD**

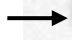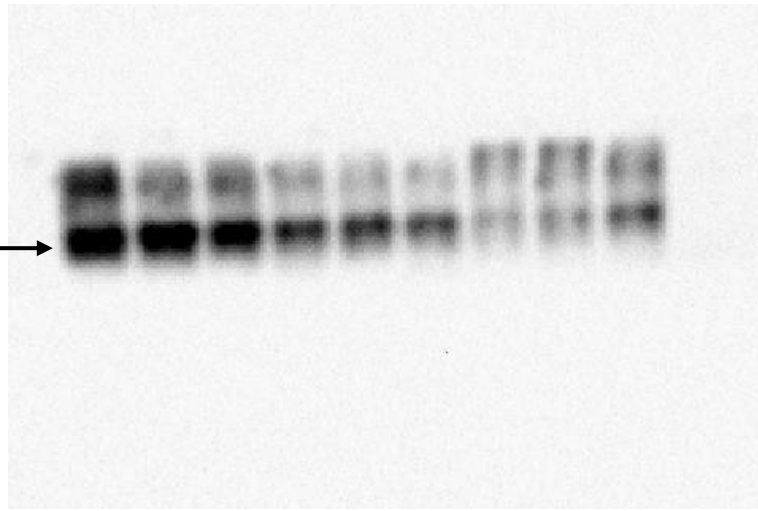

**38kD**

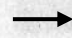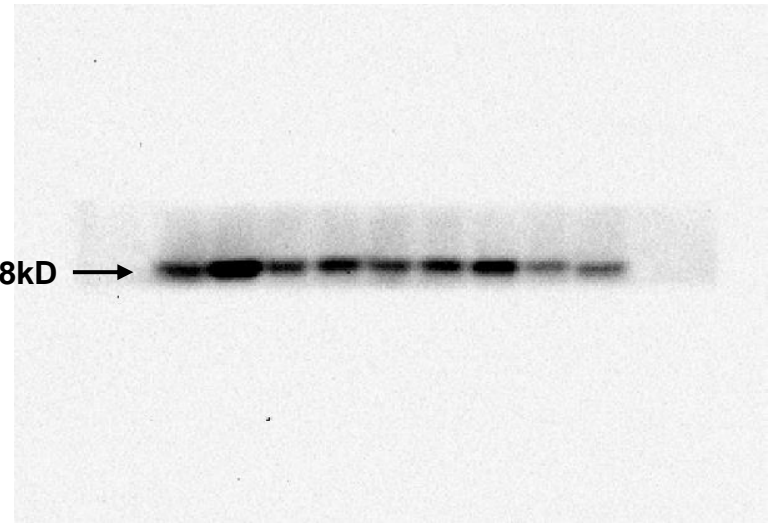

**CHOP**

**p-JNK**

**27kD**

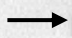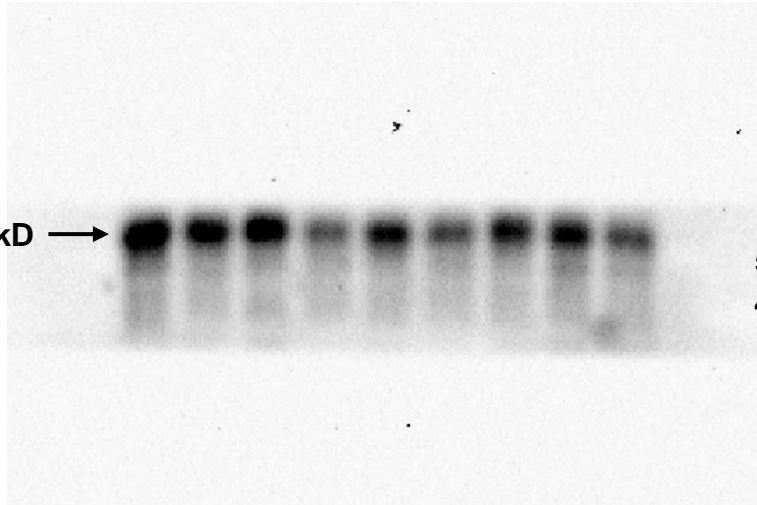

**54kD**

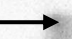

**46kD**

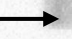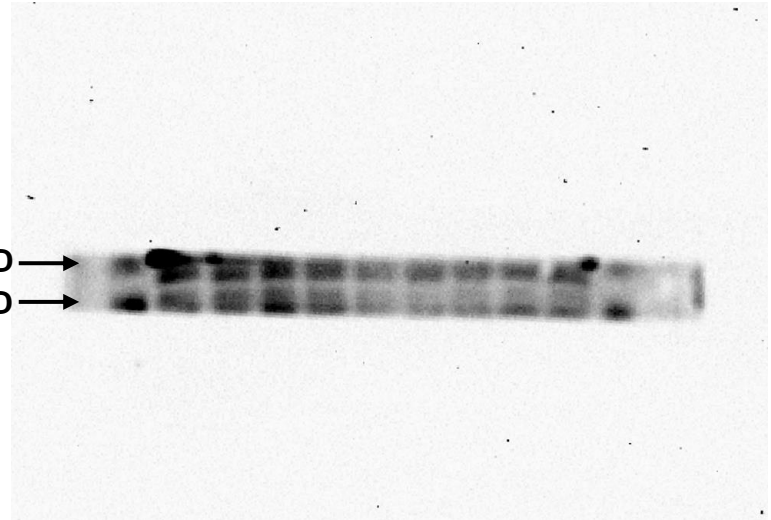

**p-p38**

**GAPDH**

**43kD**

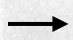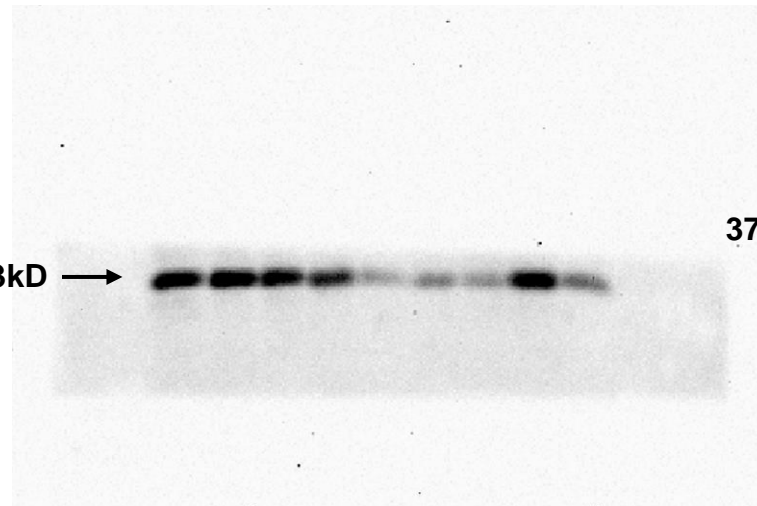

**37kD**

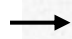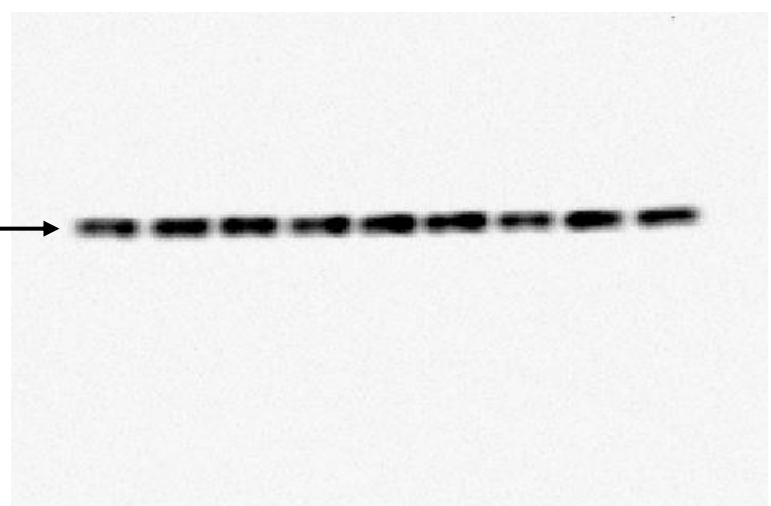

**k**

**SERCA2**

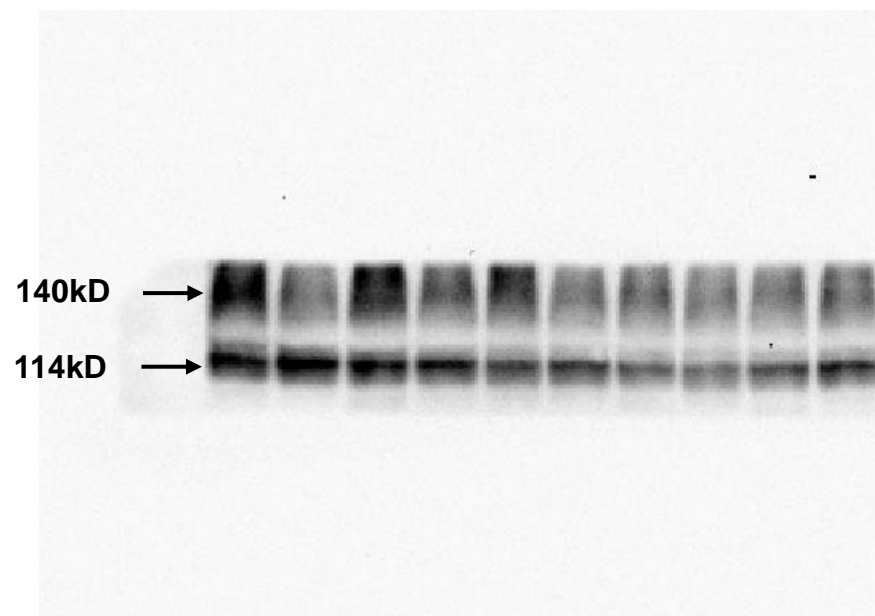

**GAPDH**

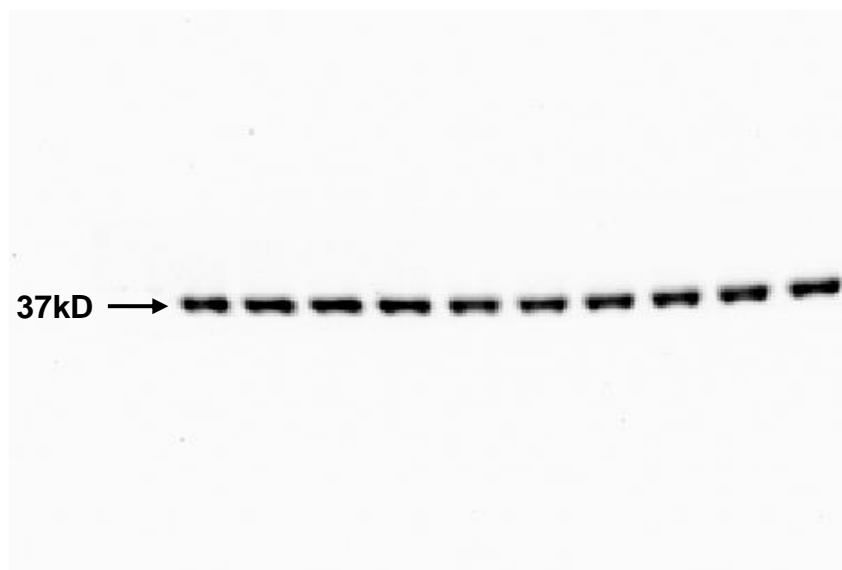

I

p-IRE

p-eIF2 $\alpha$

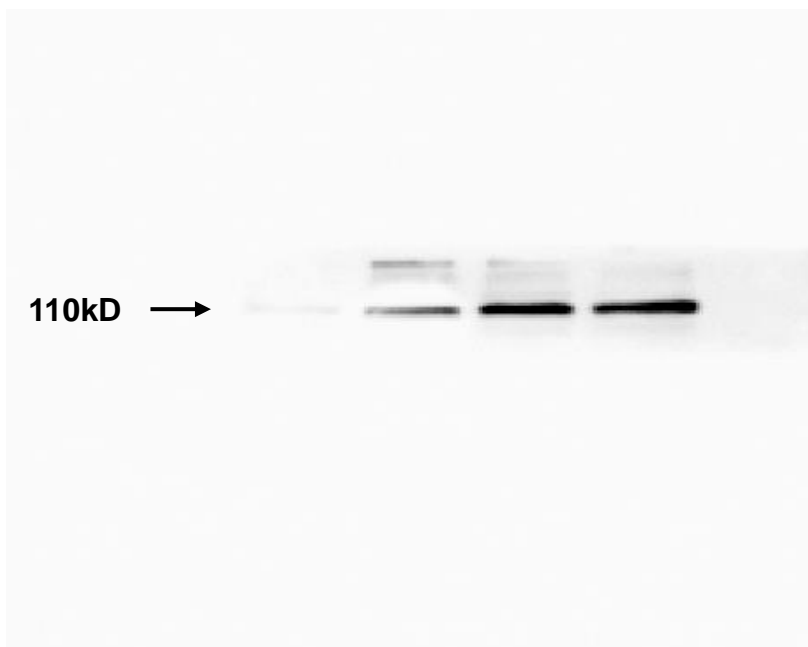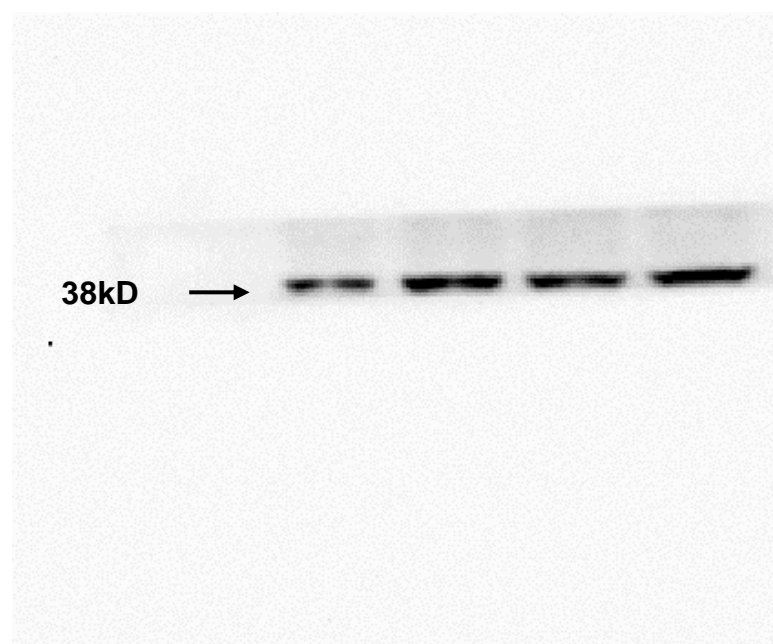

CHOP

$\beta$ -actin

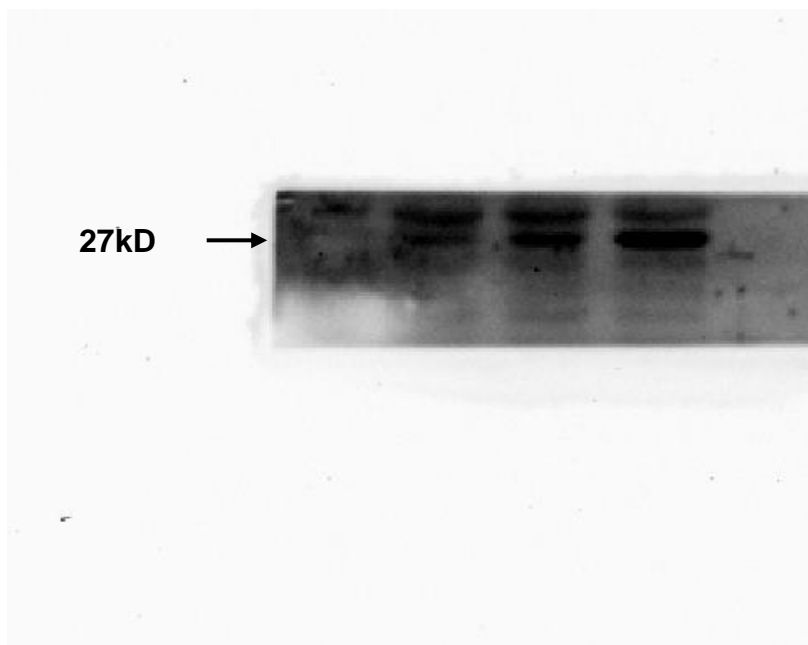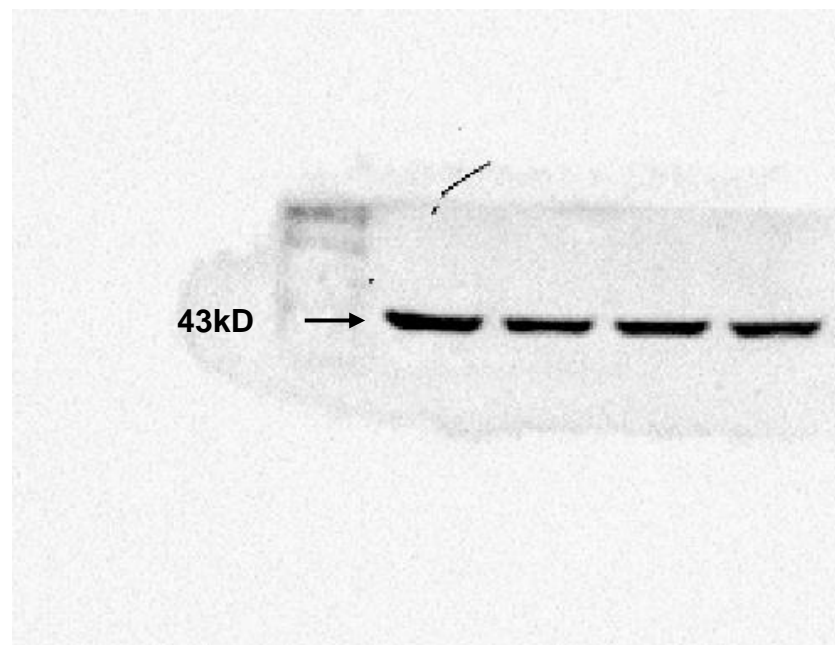

**Supplementary Figure 5.** Full western blot gel panels. **(a, b, c, d, e, f)** from which the data in **Figure 3A-F** were derived. **(g)** from which the data in **Figure 4A** were derived. **(h)** from which the data in **Figure 5E** were derived. **(i)** from which the data in **Figure 6I** were derived. **(j)** from which the data in **Figure 8A** were derived. **(k)** from which the data in **Figure 8C** were derived. **(l)** from which the data in **Supplementary Figure 3A** were derived.

**SUPPLEMENTAL MATERIAL**

**Supplementary Table 1. Sequences of the real time PCR primers used in this study**

| <b>Primers</b>       | <b>Forward</b>               | <b>Reverse</b>           |
|----------------------|------------------------------|--------------------------|
| <i>GAPDH(human)</i>  | CTCAGACACCAGGGGAAGGTGA       | ATGATCTTGAGG CTGTTGTCATA |
| <i>GAPDH</i>         | AAGGTCATCCCAGAGCTGAA         | CTGCTTCACCACCTTCTTGA     |
| <i>CHOP</i>          | CAGATTCCAGTCAGAGTTCTAT<br>GG | GACCACTCTGTTTCCGTTTCCT   |
| <i>ATF4</i>          | CCTCTGGACAAGGGTTTTGTG        | GCACCGTGAAGACATCCCC      |
| <i>sXBPI</i>         | GCCATCAAGGACGTCAGCA          | CTTCCTCCGAGTAGCGAATCAG   |
| <i>Bip</i>           | TCTGCAGGTCGTCGGACTATTC       | AGGCAGTGGCTGTGAGATGC     |
| <i>Abcc3</i>         | ACGGACTTTATCATTGTGCT         | ATCTGGTGCGTAGTTTCG       |
| <i>Abcc11</i>        | CACCATGCCCTCTACAA            | CACCATCGCAAGGAACT        |
| <i>Cyp7a1</i>        | ACAGAAGCATAGACCCAA           | TGCCAAACAGCGTTAGAT       |
| <i>SERCA2(human)</i> | GATATGCTCATGTGGTGTTG         | AATCTTCTTCAGTCGCTCCA     |
| <i>RyR</i>           | TGGGATTACAGGAAGACG           | ATCGCTCAGAGGAGACT        |
